# Supplementary material for: Phenotypic flexibility in respiratory traits is associated with improved aerial respiration in an amphibious fish out of water
Source: Oxford University Press journal article supplement (doi:10.1242/jeb.186486), 2018-01-01
Supplement: jeb186486supp.pdf [file jeb186486supp.pdf]

**Table S1. Summary of sample sizes used for each variable for each of the four strains of *K. marmoratus* acclimated to air for 0, 1, 3 and 7 days.**

| <i>Variables</i>                            | <i>Time</i> | <i>Strains</i> |                 |               |                   |
|---------------------------------------------|-------------|----------------|-----------------|---------------|-------------------|
|                                             |             | <i>Florida</i> | <i>Honduras</i> | <i>Belize</i> | <i>Freshwater</i> |
| <b>Aerial P<sub>crit</sub></b> <sup>1</sup> | 0 Days      | 12             | 12              | 12            | 12                |
|                                             | 1 Day       | 8              | 8               | 8             | 8                 |
|                                             | 3 Days      | 8              | 8               | 8             | 8                 |
|                                             | 7 Days      | 16             | 16              | 16            | 12                |
| <b>RI</b> <sup>1</sup>                      | 0 Days      | 12             | 12              | 12            | 12                |
|                                             | 1 Day       | 8              | 8               | 8             | 8                 |
|                                             | 3 Days      | 8              | 8               | 8             | 8                 |
|                                             | 7 Days      | 16             | 16              | 16            | 12                |
| <b>RMR</b> <sup>1</sup>                     | 0 Days      | 16             | 16              | 16            | 16                |
|                                             | 1 Day       | 8              | 8               | 8             | 8                 |
|                                             | 3 Days      | 8              | 8               | 8             | 8                 |
|                                             | 7 Days      | 16             | 16              | 16            | 12                |
| <b>Hematocrit</b>                           | 0 Days      | 8              | 8               | 8             | 7                 |
|                                             | 1 Day       | 8              | 7               | 7             | 8                 |
|                                             | 7 Days      | 8              | 8               | 8             | 8                 |
| <b>nRBC</b>                                 | 0 Days      | 8              | 7               | 7             | 9                 |
|                                             | 1 Day       | 8              | 7               | 7             | 8                 |
|                                             | 7 Days      | 8              | 8               | 8             | 6                 |
| <b>Dorsal Angiogenesis</b> <sup>2</sup>     | 0 Days      | 8              | 8               | 7             | 8                 |
|                                             | 1 Day       | 8              | 8               | 7             | 8                 |
|                                             | 3 Days      | 8              | 8               | 7             | 8                 |
|                                             | 7 Days      | 6              | 8               | 7             | 8                 |
| <b>Ventral Angiogenesis</b> <sup>2</sup>    | 0 Days      | 8              | 8               | 7             | 8                 |
|                                             | 1 Day       | 8              | 8               | 7             | 8                 |
|                                             | 3 Days      | 8              | 8               | 7             | 8                 |
|                                             | 7 Days      | 6              | 8               | 7             | 8                 |

<sup>1,2</sup> Denotes that the same fish were used for these variables
